# Supplementary material for: NPFF Decreases Activity of Human Arcuate NPY Neurons: A Study in Embryonic-Stem-Cell-Derived Model
Source: MDPI journal article supplement (doi:10.3390/ijms23063260), 2022-03-17
Supplement: s1 [file s1]

**Supplemental Table S1.** Comparison of percentages of mouse hypothalamic neurons expressing NPFF receptors in studies selected for the re-analysis (Data are shown as means  $\pm$  SEM) [37–40].

|                        | Npffr1 * | Npffr2 * | Npffr1 + Npffr2 * | Adjust Factor ** | Npffr2 Adjusted<br>(Npffr2 x Adjusted Factor) |
|------------------------|----------|----------|-------------------|------------------|-----------------------------------------------|
| Campbell et al., 2017  | 5.8      | 1.17     | 0.19              | 1.0              | 1.17                                          |
| Kim et al., 2019       | 11.68    | 1.4      | 0.26              | 0.71             | 0.99                                          |
| Mickelsen et al., 2019 | 8.28     | 0.0      | 0.0               | 0.64             | 0.0                                           |
| Romanov et al., 2017   | 5.68     | 0.58     | 0.22              | 0.72             | 0.40                                          |

\* % of neurons expressing gene or co-expressing genes. \*\* based on genes detected per cell.

**Supplemental Table S2.** Percentages of neurons expressing different neuronal markers in Npffr2-positive neuron population in mouse ARC (Data are shown as means  $\pm$  SEM; data from re-analysis [37]).

| Gene           | Number of Positive Cells | %     |
|----------------|--------------------------|-------|
| <i>Npffr2</i>  | 152                      | 100   |
| <i>Npy</i>     | 98                       | 64.47 |
| <i>Gad2</i>    | 98                       | 64.47 |
| <i>Gad1</i>    | 97                       | 63.81 |
| <i>Agrp</i>    | 91                       | 59.86 |
| <i>Pomc</i>    | 61                       | 40.13 |
| <i>Sst</i>     | 43                       | 28.28 |
| <i>Ddc</i>     | 40                       | 26.31 |
| <i>Slc17a6</i> | 33                       | 21.71 |
| <i>Npffr1</i>  | 25                       | 16.45 |
| <i>Pnoc</i>    | 24                       | 15.79 |
| <i>Th</i>      | 7                        | 4.60  |

**Supplemental Table S3.** List of significantly enriched gene in *Npffr2*-positive compared to *Npffr2*-negative mouse arcuate neurons (Data are shown as means  $\pm$  SEM) [37].

| Gene                 | <i>p</i> Value         | Mean log Fold Change | % of Npffr2+ Neurons Expressing Gene | % of Npffr2- Neurons Expressing Gene | <i>p</i> Value Adjusted |
|----------------------|------------------------|----------------------|--------------------------------------|--------------------------------------|-------------------------|
| <i>Npffr2</i>        | 0                      | 1.21                 | 1                                    | 0                                    | 0                       |
| <i>Acvr1c</i>        | $1.94 \times 10^{-35}$ | 0.73                 | 0.48                                 | 0.13                                 | $4.42 \times 10^{-31}$  |
| <i>Agrp</i>          | $2.97 \times 10^{-27}$ | 1.03                 | 0.60                                 | 0.24                                 | $6.77 \times 10^{-23}$  |
| <i>Serpina3n</i>     | $6.00 \times 10^{-25}$ | 0.72                 | 0.62                                 | 0.26                                 | $1.37 \times 10^{-20}$  |
| <i>Gm8773</i>        | $7.90 \times 10^{-22}$ | 0.38                 | 0.22                                 | 0.05                                 | $1.80 \times 10^{-17}$  |
| <i>Npy2r</i>         | $2.88 \times 10^{-20}$ | 0.41                 | 0.57                                 | 0.23                                 | $6.56 \times 10^{-16}$  |
| <i>Npy</i>           | $1.09 \times 10^{-18}$ | 1.06                 | 0.65                                 | 0.36                                 | $2.48 \times 10^{-14}$  |
| <i>Otp</i>           | $6.38 \times 10^{-18}$ | 0.44                 | 0.51                                 | 0.21                                 | $1.45 \times 10^{-13}$  |
| <i>Cited1</i>        | $2.99 \times 10^{-17}$ | 0.58                 | 0.80                                 | 0.51                                 | $6.82 \times 10^{-13}$  |
| <i>Csgalnact1</i>    | $2.05 \times 10^{-16}$ | 0.26                 | 0.31                                 | 0.10                                 | $4.67 \times 10^{-12}$  |
| <i>Hspb8</i>         | $1.02 \times 10^{-14}$ | 0.27                 | 0.28                                 | 0.09                                 | $2.32 \times 10^{-10}$  |
| <i>Irs4</i>          | $1.22 \times 10^{-14}$ | 0.50                 | 0.68                                 | 0.40                                 | $2.79 \times 10^{-10}$  |
| <i>Ghr</i>           | $5.98 \times 10^{-14}$ | 0.36                 | 0.41                                 | 0.17                                 | $1.36 \times 10^{-9}$   |
| <i>Vwa5a</i>         | $7.39 \times 10^{-14}$ | 0.28                 | 0.30                                 | 0.11                                 | $1.68 \times 10^{-9}$   |
| <i>Dgkk</i>          | $9.15 \times 10^{-14}$ | 0.36                 | 0.55                                 | 0.26                                 | $2.09 \times 10^{-9}$   |
| <i>Arhgef28</i>      | $1.22 \times 10^{-13}$ | 0.40                 | 0.42                                 | 0.18                                 | $2.78 \times 10^{-9}$   |
| <i>Hspa1a</i>        | $1.86 \times 10^{-13}$ | 0.46                 | 0.38                                 | 0.16                                 | $4.24 \times 10^{-9}$   |
| <i>Prune2</i>        | $3.35 \times 10^{-13}$ | 0.39                 | 0.66                                 | 0.35                                 | $7.63 \times 10^{-9}$   |
| <i>Gnal</i>          | $2.43 \times 10^{-12}$ | 0.30                 | 0.59                                 | 0.30                                 | $5.54 \times 10^{-8}$   |
| <i>Flrt3</i>         | $6.49 \times 10^{-12}$ | 0.25                 | 0.42                                 | 0.18                                 | $1.48 \times 10^{-7}$   |
| <i>Phf6</i>          | $1.47 \times 10^{-11}$ | 0.35                 | 0.39                                 | 0.17                                 | $3.36 \times 10^{-7}$   |
| <i>B2m</i>           | $2.10 \times 10^{-10}$ | 0.27                 | 0.54                                 | 0.29                                 | $4.78 \times 10^{-6}$   |
| <i>Rpl13</i>         | $4.65 \times 10^{-10}$ | 0.30                 | 0.74                                 | 0.46                                 | $1.06 \times 10^{-5}$   |
| <i>Angpt1</i>        | $1.42 \times 10^{-9}$  | 0.27                 | 0.22                                 | 0.08                                 | $3.23 \times 10^{-5}$   |
| <i>Ociad2</i>        | $2.20 \times 10^{-9}$  | 0.34                 | 0.64                                 | 0.39                                 | $5.01 \times 10^{-5}$   |
| <i>Arhgap6</i>       | $1.36 \times 10^{-8}$  | 0.31                 | 0.62                                 | 0.38                                 | $3.10 \times 10^{-4}$   |
| <i>Jun</i>           | $1.91 \times 10^{-8}$  | 0.36                 | 0.61                                 | 0.39                                 | $4.36 \times 10^{-4}$   |
| <i>Tmem255a</i>      | $3.05 \times 10^{-8}$  | 0.28                 | 0.73                                 | 0.46                                 | $6.96 \times 10^{-4}$   |
| <i>Dnm3</i>          | $6.50 \times 10^{-8}$  | 0.29                 | 0.81                                 | 0.58                                 | $1.48 \times 10^{-3}$   |
| <i>Arhgap36</i>      | $6.63 \times 10^{-8}$  | 0.32                 | 0.59                                 | 0.37                                 | $1.51 \times 10^{-3}$   |
| <i>1500012F01Rik</i> | $7.43 \times 10^{-8}$  | 0.33                 | 0.72                                 | 0.50                                 | $1.69 \times 10^{-3}$   |
| <i>Gas5</i>          | $8.82 \times 10^{-8}$  | 0.27                 | 0.90                                 | 0.77                                 | $2.01 \times 10^{-3}$   |
| <i>Eef2</i>          | $9.33 \times 10^{-8}$  | 0.27                 | 0.88                                 | 0.66                                 | $2.13 \times 10^{-3}$   |
| <i>Rgs2</i>          | $1.26 \times 10^{-7}$  | 0.43                 | 0.73                                 | 0.55                                 | $2.88 \times 10^{-3}$   |
| <i>Ndn</i>           | $2.49 \times 10^{-7}$  | 0.26                 | 0.92                                 | 0.74                                 | $5.67 \times 10^{-3}$   |
| <i>Fos</i>           | $8.08 \times 10^{-7}$  | 0.27                 | 0.49                                 | 0.29                                 | $1.84 \times 10^{-2}$   |

**Supplemental Table S4.** Results from the main gene expression analysis. The Delta ( $\Delta$ CT) relative quantification method was used to evaluate mRNA levels of target genes relative to a housekeeping gene (ACTB) in hNSC, hDHN and hALN (Data are shown as means  $\pm$  SEM).

| Gene ID        | hNSC (n=3) |      | hDHN (n=3) |      | hALN (n=2) |      |
|----------------|------------|------|------------|------|------------|------|
|                | Mean       | SEM  | Mean       | SEM  | Mean       | SEM  |
| <i>AGRP</i>    | 13.21      | 1.04 | 16.23      | 0.67 | 15.14      | 0.38 |
| <i>ASCL1</i>   | 4.51       | 0.55 | 4.58       | 0.65 | 6.22       | 0.21 |
| <i>CARTPT</i>  | -          | -    | 15.27~     | ~    | 11.30      | 0.30 |
| <i>CRH</i>     | 7.66       | 0.19 | 12.96      | 1.03 | 12.80      | 0.20 |
| <i>DBX1</i>    | 13.73      | 0.50 | 10.74*     | 0.09 | 13.98      | 0.15 |
| <i>EMX1</i>    | 10.59      | 0.90 | -          | -    | 15.01~     | ~    |
| <i>EN2</i>     | 15.42      | 0.78 | 15.89      | 0.72 | 14.01      | 0.23 |
| <i>FOXP1</i>   | 4.13       | 0.52 | 4.75       | 0.10 | 6.83       | 0.01 |
| <i>GAD1</i>    | 10.19      | 0.52 | 7.61       | 0.32 | 4.20       | 0.13 |
| <i>GAD2</i>    | 10.70      | 0.23 | 7.26*      | 0.18 | 7.70       | 0.26 |
| <i>KISS1</i>   | -          | -    | -          | -    | 15.65      | 0.63 |
| <i>MAP2</i>    | 423        | 0.36 | 3.37       | 0.20 | 3.54       | 0.33 |
| <i>MCH</i>     | 11.81      | 0.63 | 14.88      | 0.66 | 8.74       | 0.27 |
| <i>NEUN</i>    | 10.21      | 0.57 | 10.83      | 0.27 | 9.13       | 0.24 |
| <i>NEUROD1</i> | 7.09       | 0.65 | 6.40       | 0.28 | 10.33      | 0.32 |
| <i>NEUROG3</i> | 9.83       | 1.61 | 12.65      | 1.57 | 15.08      | 1.12 |
| <i>NHLH2</i>   | 9.86       | 1.69 | 12.32      | 0.92 | 12.11      | 0.10 |
| <i>NKX2.1</i>  | 9.24*      | 0.52 | 7.17       | 0.05 | 8.46       | 0.88 |
| <i>NPFFR1</i>  | 15.13      | 1.02 | 15.80      | 0.59 | 11.76      | 0.44 |
| <i>NPFFR2</i>  | 12.88      | 0.91 | 13.67      | 0.24 | 9.99       | 0.67 |
| <i>NPY</i>     | 11.58      | 0.28 | 14.38      | 0.31 | 9.65       | 0.39 |
| <i>OTP</i>     | 15.71      | 1.25 | 13.90      | 0.32 | 7.75*      | 0.01 |
| <i>PAX6</i>    | 3.45       | 0.45 | 7.25       | 0.20 | 7.23       | 0.01 |
| <i>POMC</i>    | 12.24      | 1.66 | -          | -    | 13.29      | 0.50 |
| <i>POU5F1</i>  | 10.01      | 2.38 | 12.33      | 1.77 | 11.47      | 0.11 |
| <i>RAX</i>     | 13.94      | 1.16 | 15.56      | 0.35 | 15.43      | 0.06 |
| <i>SIM1</i>    | 12.94      | 0.73 | 12.98      | 0.39 | 7.89       | 0.34 |
| <i>SLC17A7</i> | 13.14      | 0.77 | 13.50      | 0.24 | 12.39      | 0.04 |
| <i>SOX1</i>    | 9.63       | 0.80 | 11.69      | 0.60 | 12.45      | 0.00 |
| <i>SST</i>     | 9.46       | 0.29 | 8.38       | 0.27 | 8.55       | 0.21 |
| <i>TH</i>      | 12.62      | 1.23 | 11.68 *    | 0.30 | 9.29*      | 0.11 |
| <i>TRH</i>     | 11.08      | 1.10 | 11.39      | 0.26 | 6.94       | 1.12 |

- Undetermined Ct values after 40 cycles. ~ Only one Ct value available. \*  $p$  value < 0.05.

**Supplemental Table S5.** List of primers used in this study.

| Gene           | TaqMan Reference |
|----------------|------------------|
| <i>18S</i>     | Hs99999901_s1    |
| <i>ACTB</i>    | Hs01060665_g1    |
| <i>AGRP</i>    | Hs003614403_g1   |
| <i>ASCL1</i>   | Hs00269932_m1    |
| <i>CARTPT</i>  | Hs00182861_m1    |
| <i>CRH</i>     | Hs01921237_s1    |
| <i>DDX1</i>    | Hs01380082_m1    |
| <i>EMX1</i>    | Hs00417957_m1    |
| <i>EN2</i>     | Hs00171321_m1    |
| <i>FOXG1</i>   | Hs00702391_s1    |
| <i>GAD1</i>    | Hs01065893_m1    |
| <i>GAD2</i>    | Hs00609534_m1    |
| <i>KISS1</i>   | Hs00158486_m1    |
| <i>MAP2</i>    | Hs00258900_m1    |
| <i>MCH</i>     | Hs01041242_g1    |
| <i>NEUN</i>    | Hs02760627_g1    |
| <i>NEUROD1</i> | Hs01922995_s1    |
| <i>NEUROG3</i> | Hs01875204_s1    |
| <i>NHLH2</i>   | Hs00271585_s1    |
| <i>NKX2.1</i>  | Hs00968940_m1    |
| <i>NPFFR1</i>  | HS00223340_m1    |
| <i>NPFFR2</i>  | Hs01003259_m1    |
| <i>NPY</i>     | Hs00173470_m1    |
| <i>OTP</i>     | Hs00259528_m1    |
| <i>PAX6</i>    | Hs01088106_g1    |
| <i>POMC</i>    | Hs01596743_m1    |
| <i>POU5F1</i>  | Hs04995079_g1    |
| <i>RAX</i>     | Hs00429459_m1    |
| <i>SIM1</i>    | Hs00231914_m1    |
| <i>SLC17A7</i> | Hs00220404_m1    |
| <i>SOX1</i>    | Hs01057642_s1    |
| <i>SST</i>     | Hs00356144_m1    |
| <i>TH</i>      | Hs00165941_m1    |
| <i>TRH</i>     | Hs00999489_m1    |
